# Supplementary material
Source: PubMed Central journal article supplement (PMC1693870)

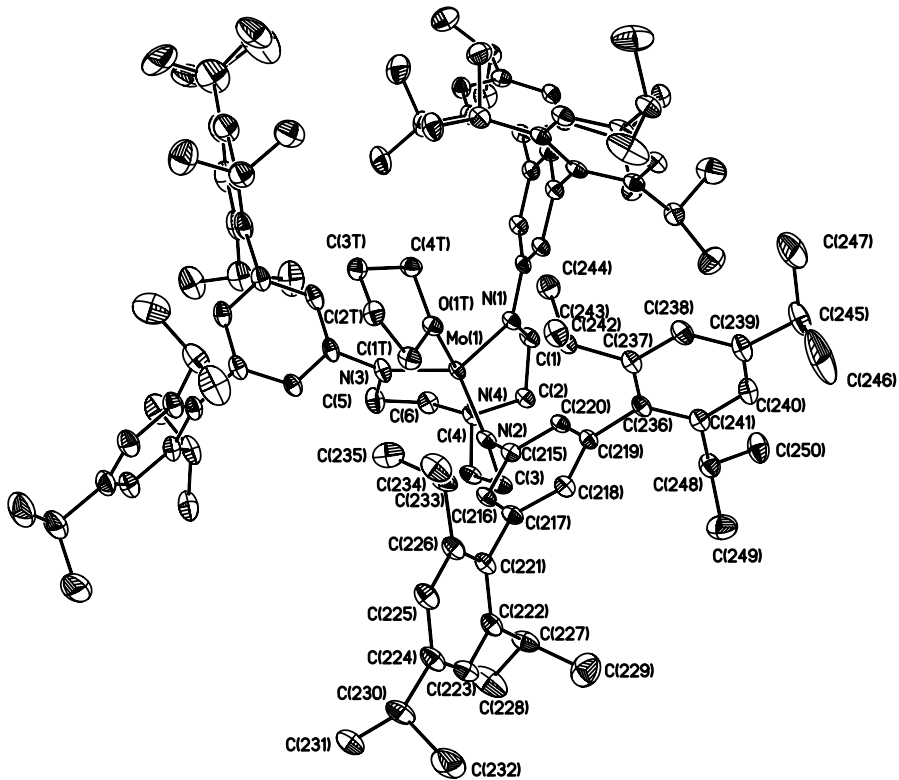

Supplement: pnas_0602778103_1.pdf [file pnas_0602778103_1.pdf]

**Ammonia Solubility = 102.64 mmol / atm**

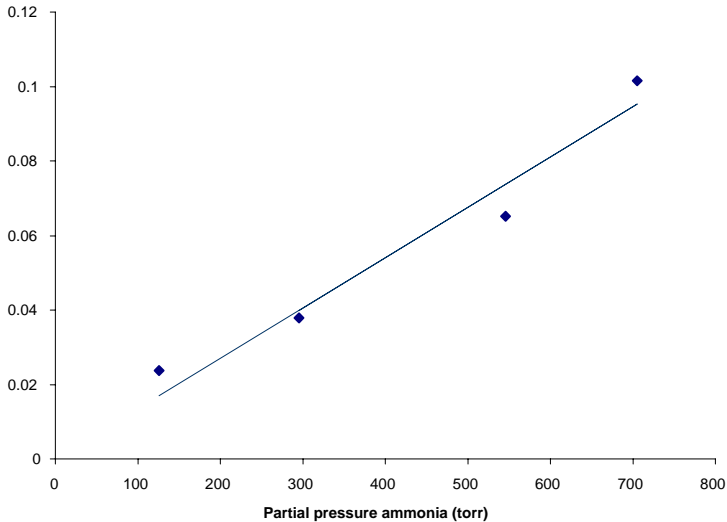

Supplement: pnas_0602778103_2.pdf [file pnas_0602778103_2.pdf]

## Dinitrogen Solubility = 43.96 mmol / atm

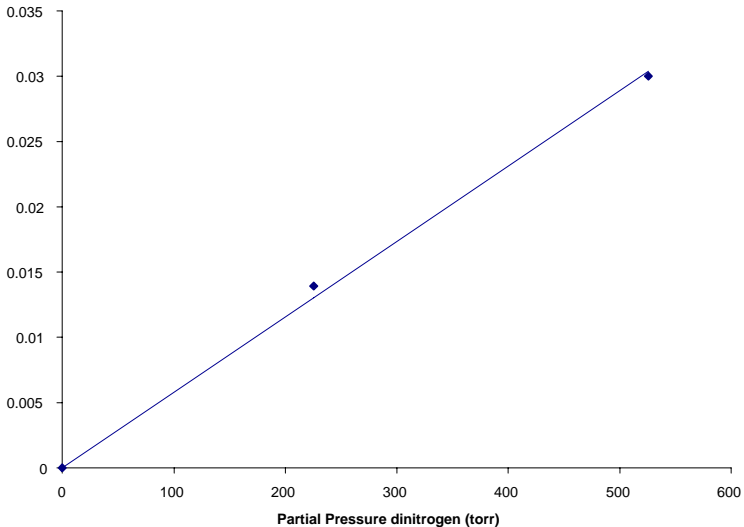

Supplement: pnas_0602778103_3.pdf [file pnas_0602778103_3.pdf]

**Slope = 0.00467 +/- 0.00006**

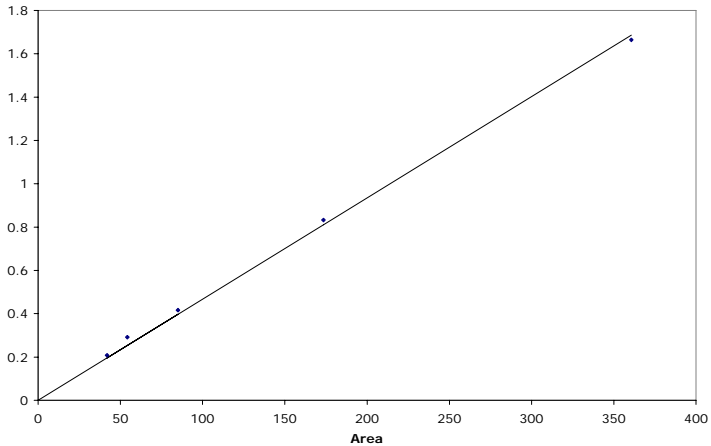

Supplement: pnas_0602778103_4.pdf [file pnas_0602778103_4.pdf]

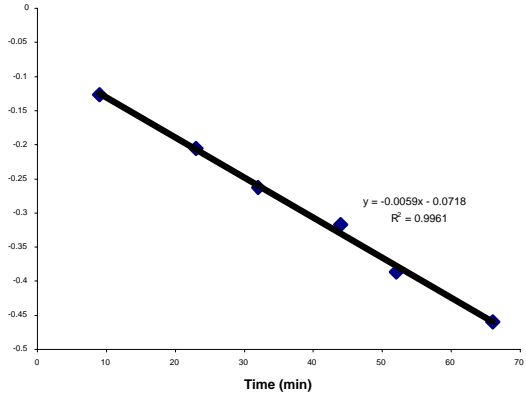

Supplement: pnas_0602778103_5.pdf [file pnas_0602778103_5.pdf]

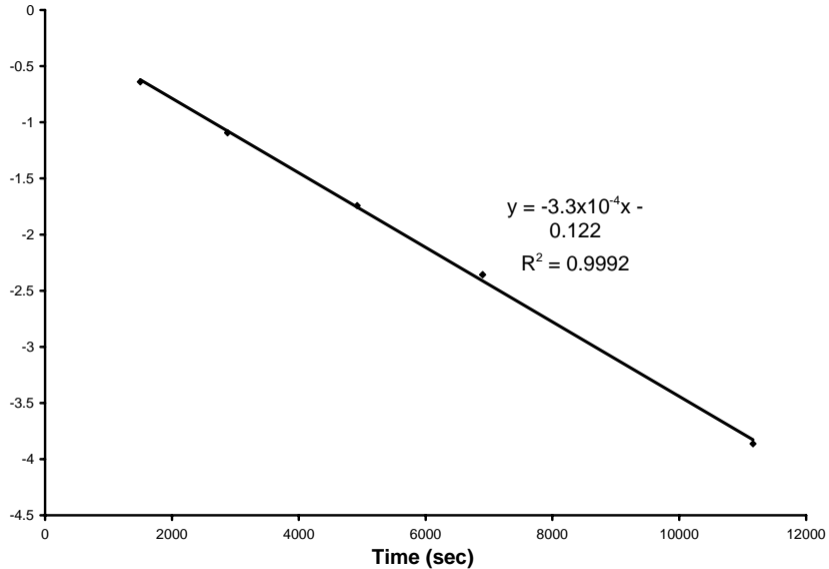

Supplement: pnas_0602778103_6.pdf [file pnas_0602778103_6.pdf]

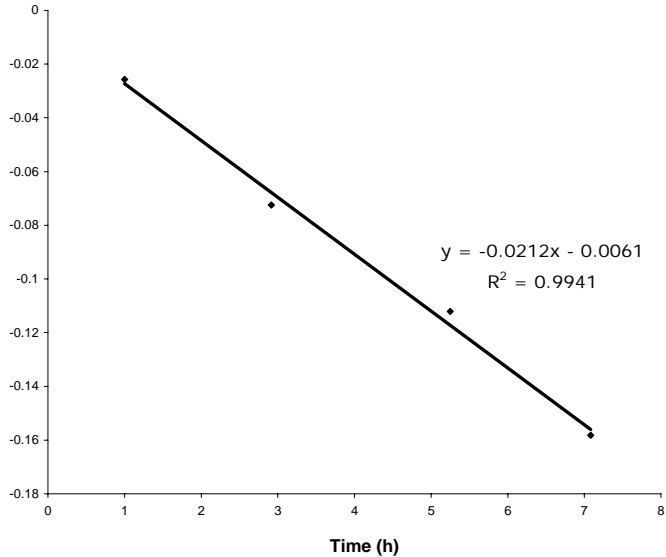

Supplement: pnas_0602778103_7.pdf [file pnas_0602778103_7.pdf]
